# Supplementary material for: Cost-benefit analysis of universal screening for HCV infection in China: A Markov modelling study
Source: Research Square preprint supplement (doi:10.21203/rs.3.rs-6886757/v1), 2025-06-20
Supplement: Supplementary file 1 [file 55a0398efe2136d3b0eaf7f3.docx]

# Appendix-Cost-benefit analysis of universal screening for HCV infection in China: A Markov modelling study

**Contents**

[Appendix-Cost-benefit analysis of universal screening for HCV infection in China: A Markov modelling study 1](#_Toc192931499)

[Appendix Table 1. Consolidated Health Economic Evaluation Reporting Standards framework 2](#_Toc192931500)

[Appendix Table 1. Initial Health State Distribution of Population in model 4](#_Toc192931501)

[Appendix Table 3. Initial Health State Distribution of HCV-Infected Individuals 6](#_Toc192931502)

[Appendix Figure 1. Correlation Analysis of Chronic HCV Incidence and Prevalence Across Age Groups 7](#_Toc192931503)

[Appendix Table 4. Incidence-Prevalence Relationship for Chronic HCV in the 0–44 Age Group 8](#_Toc192931504)

[Appendix Figure 2. ARIMA-Based Prediction of HCV Incidence in the 45+ Age Group 9](#_Toc192931505)

[Appendix Table 5. Parameters used in Markov 10](#_Toc192931506)

## Appendix Table 1. Consolidated Health Economic Evaluation Reporting Standards framework1

| **Section** | **Item** | **Description** | **Page number in manuscript** |
| --- | --- | --- | --- |
| **Title and Abstract** | **1. Title** | Identify the study as an economic evaluation. | 1 |
|  | **2. Abstract** | Provide a structured abstract with background, methods, results, and conclusions. | 2-3 |
| **Introduction** | **3. Background and Objectives** | Describe the study context and objectives. | 4-5 |
| **Methods** | **4. Target Population and Setting** | Define the target population, setting, and analytical perspective (e.g., healthcare system, societal). | 9 |
|  | **5. Comparators and Interventions** | Describe the interventions and comparators evaluated in the study. | 9-10 |
|  | **6. Time Horizon** | State the time horizon for the analysis and justify its choice. | 9 |
|  | **7. Discount Rate** | Report the discount rate applied to costs and outcomes. | 13 |
|  | **8. Choice of Outcomes** | Define the primary and secondary health outcomes and how they were measured. | 14-15 |
|  | **9. Measurement of Effectiveness** | Explain the source of effectiveness data (e.g., trials, observational studies, modeling). | 15 |
|  | **10. Measurement and Valuation of Costs** | Describe how costs were measured and valued in the study. | 13 |
|  | **11. Modeling** | If modeling was used (e.g., Markov models, simulations), describe its structure, assumptions, and validation. | 10 |
|  | **12. Analytic Methods** | Explain the statistical and analytical methods used, including uncertainty analysis. | 15 |
| **Results** | **13. Study Parameters** | Report key model parameters, sources, and estimated values. | Appendix pp 10-11 |
|  | **14. Uncertainty Analysis** | Describe how uncertainty was assessed (e.g., sensitivity analysis, scenario analysis). | 15-16 |
|  | **15. Results** | Present key findings, including incremental cost-effectiveness ratios (ICERs) where applicable. | 17-18 |
| **Discussion** | **16. Study Findings and Policy Implications** | Discuss the significance of findings and compare with existing literature. | 23-24 |
|  | **17. Limitations** | Acknowledge study limitations and their potential impact. | 25-26 |
|  | **18. Conclusions** | Summarize key takeaways and suggest directions for future research. | 27 |
| **Other** | **19. Funding and Conflicts of Interest** | Disclose funding sources and potential conflicts of interest. | 28 |
|  | **20. Data Availability** | Provide information on data availability and sharing policies. | 28-29 |

## Appendix Table 1. Initial Health State Distribution of Population in model2

| **Age group** | **<5** | **5~9** | **10~14** | **15-19** | **20-24** | **25-29** | **30-34** | **35-39** | **40-44** | **45-49** | **50-54** | **55-59** | **60-64** | **65-69** | **70-74** |
| --- | --- | --- | --- | --- | --- | --- | --- | --- | --- | --- | --- | --- | --- | --- | --- |
| Population | 6.78E+07 | 8.12E+07 | 7.30E+07 | 7.21E+07 | 7.41E+07 | 8.34E+07 | 1.11E+08 | 1.23E+08 | 1.03E+08 | 1.02E+08 | 1.18E+08 | 1.22E+08 | 8.95E+07 | 7.48E+07 | 6.10E+07 |
| Incidence of HCV | 0.15% | 0.04% | 0.02% | 0.01% | 0.01% | 0.01% | 0.01% | 0.01% | 0.01% | 0.01% | 0.02% | 0.02% | 0.03% | 0.04% | 0.06% |
| Prevalence of HCV | 0.52% | 0.93% | 1.06% | 1.12% | 1.14% | 1.19% | 1.26% | 1.32% | 1.39% | 1.45% | 1.53% | 1.62% | 1.73% | 1.87% | 2.07% |
| Incidence of HCC | 0.00% | 0.00% | 0.00% | 0.00% | 0.00% | 0.00% | 0.00% | 0.00% | 0.00% | 0.00% | 0.00% | 0.00% | 0.01% | 0.01% | 0.01% |
| Prevalence of HCC | 0.00% | 0.00% | 0.00% | 0.00% | 0.00% | 0.00% | 0.00% | 0.00% | 0.00% | 0.00% | 0.00% | 0.00% | 0.01% | 0.01% | 0.01% |
| F0 | 66.20% | 66.20% | 66.20% | 66.20% | 58.39% | 58.39% | 58.39% | 58.39% | 23.03% | 23.03% | 23.03% | 23.03% | 7.70% | 7.70% | 7.70% |
| F1 | 24.60% | 24.60% | 24.60% | 24.60% | 27.11% | 27.11% | 27.11% | 27.11% | 36.69% | 36.69% | 36.69% | 36.69% | 16.61% | 16.61% | 16.61% |
| F2 | 7.10% | 7.10% | 7.10% | 7.10% | 10.12% | 10.12% | 10.12% | 10.12% | 27.11% | 27.11% | 27.11% | 27.11% | 21.16% | 21.16% | 21.16% |
| F3 | 2.10% | 2.10% | 2.10% | 2.10% | 3.06% | 3.06% | 3.06% | 3.06% | 10.12% | 10.12% | 10.12% | 10.12% | 22.27% | 22.27% | 22.27% |
| F4 | 0.00% | 0.00% | 0.00% | 0.00% | 1.33% | 1.33% | 1.33% | 1.33% | 3.06% | 3.06% | 3.06% | 3.06% | 32.25% | 32.25% | 32.25% |

## Appendix Table 3. Initial Health State Distribution of HCV-Infected Individuals3

| **Age** | **<18** | **18-39** | **40-59** | **>=60** |
| --- | --- | --- | --- | --- |
| F0 | 66.20% | 58.39% | 23.03% | 7.70% |
| F1 | 24.60% | 27.11% | 36.69% | 16.61% |
| F2 | 7.10% | 10.12% | 27.11% | 21.16% |
| F3 | 2.10% | 3.06% | 10.12% | 22.27% |
| F4 | 0.00% | 1.33% | 3.06% | 32.25% |

## Appendix Figure 1. Correlation Analysis of Chronic HCV Incidence and Prevalence Across Age Groups2


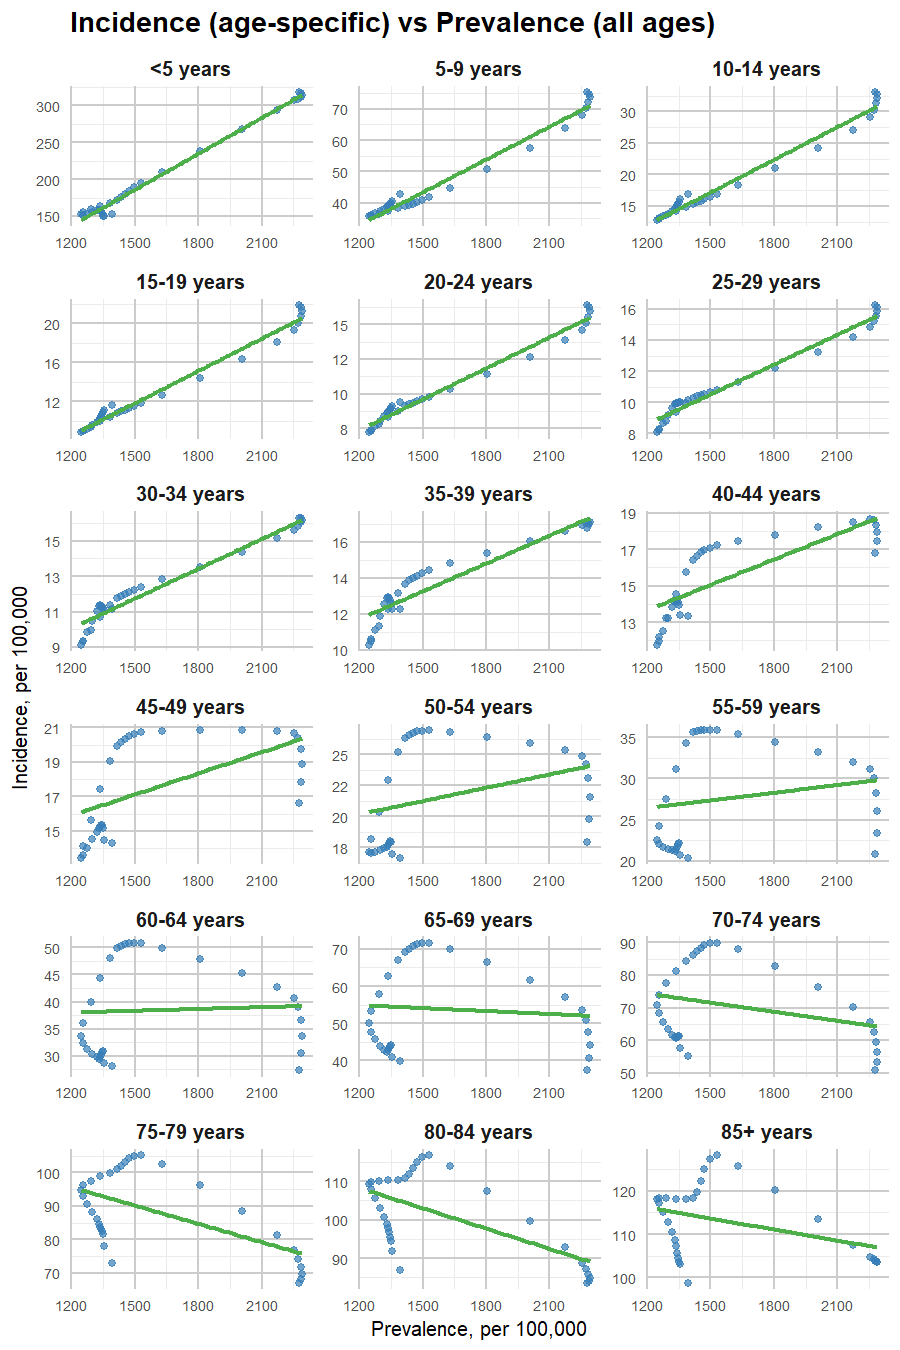


## Appendix Table 4. Incidence-Prevalence Relationship for Chronic HCV in the 0–44 Age Group

| **Age group** | **Incidence, per 100,000** |
| --- | --- |
| <5 | -57.12+0.16×prevalence |
| 5~9 | -9.14+0.04×prevalence |
| 10~14 | -8.78+0.02×prevalence |
| 15-19 | -4.73+0.01×prevalence |
| 20-24 | -1.53+0.01×prevalence |
| 25-29 | 0.96+0.01×prevalence |
| 30-34 | 3.37+0.01×prevalence |
| 35-39 | 5.56+0.01×prevalence |
| 40-44 | 8.11+0.01×prevalence |

## Appendix Figure 2. ARIMA-Based Prediction of HCV Incidence in the 45+ Age Group4


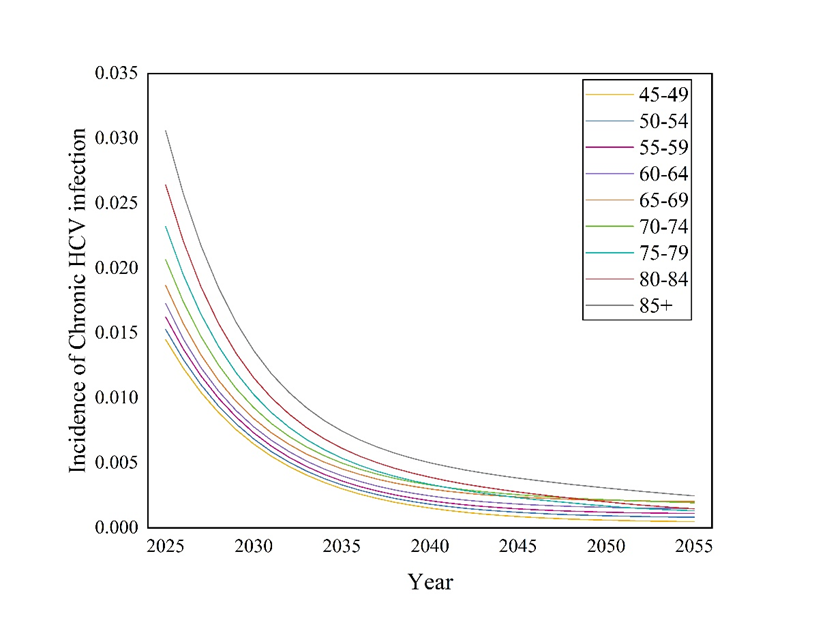


## Appendix Table 5. Parameters used in Markov

| Parameters | Base-case value (range) | Distribution (a, b) | Reference |
| --- | --- | --- | --- |
| **Transition rate** |  |  |  |
| From F0 to F1 | 11.70% (10.53%-12.87%) | Beta (264.78, 1998.32) | Thein H et al. (2008)5 |
| From F1 to F2 | 8.50% (7.65%-9.35%) | Beta (274.42, 2954.00) |
| From F2 to F3 | 12.10% (10.89%-13.31%) | Beta (263.58, 1914.76) |
| From F3 to F4 | 11.60% (10.44%-12.76%) | Beta (265.08, 2020.12) |
| From F3 to DC | 1.20% (1.08%-1.32%) | Beta (296.39, 24402.61) | Chahal et al. (2016)6 |
| From F3 to HCC | 1.10% (0.99%-1.21%) | Beta (296.69, 26675.04) |
| From SVR F3 to SVR F2 | 26.70% (24.03%-29.37%) | Beta (219.63, 602.96) | Maylin et al. (2008)7 |
| From SVR F3 to HCC | 0.30% (0.27%-0.33%) | Beta (299.10, 99399.90) | Zhou H et al. (2020)8 |
| From F4 to DC | 3.90% (3.51%-4.29%) | Beta (288.26, 7103.05) | Chahal et al. (2016)6 |
| From F4 to HCC | 2.40% (2.16%-2.64%) | Beta (292.78, 11906.22) |
| From SVR F4 to SVR F3 | 7.60% (6.84%-8.36%) | Beta (277.12, 3369.24) | Zhou H et al. (2024)8 |
| From SVR F4 to DC | 0.30% (0.27%-0.33%) | Beta (299.10, 99399.90) | Zhou H et al. (2020)8 |
| From SVR F4 to HCC | 0.30% (0.27%-0.33%) | Beta (299.10, 99399.90) |
| From SVR DC to SVR F4 | 7.60% (6.84%-8.36%) | Beta (277.12, 3369.24) |
| From SVR DC to HCC | 0.30% (0.27%-0.33%) | Beta (299.10, 99399.90) | Zhou H et al. (2024)8 |
| From SVR DC to LT | 0.03% (0.03%-0.03%) | Beta (299.91, 999399.09) | Zhou H et al. (2020)8 |
| From SVR DC to Death | 4.20% (3.78%-4.62%) | Beta (287.36, 6554.50) |
| From DC to HCC | 1.40% (1.26%-1.54%) | Beta (295.79, 20831.79) |
| From DC to LT | 0.03% (0.03%-0.03%) | Beta (299.91, 999399.09) |
| From DC to Death | 5.20% (4.68%-5.72%) | Beta (284.35, 5183.88) |
| From HCC to LT | 0.05% (0.05%-0.06%) | Beta (299.85, 599399.15) |
| From HCC to Death | 36.80% (33.12%-40.48%) | Beta (189.23, 324.99) |
| From LT to Death (1) | 21.87% (19.68%-24.06%) | Beta (234.17, 836.57) |
| From LT to Death (1+) | 6.68% (6.01%-7.35%) | Beta (279.89, 3910.12) |
| **Other parameters** |  |  |  |
| Detection rate without screening | 18.00% (16.20%-19.80%) | Beta (245.82, 1119.85) | Zhou H et al. (2024)8 |
| Acceptability of treatment after passive diagnosis | 62.00% (55.80%-68.20%) | Beta (113.38, 69.49) |
| Acceptability of treatment after active screening and CHC diagnosis | 88.00% (79.20%-96.80%) | Beta (35.12, 4.79) | Liu Y et al. (2019)9 |
| Pan-genotypic DAA in patients with F0-F4 | 96.00% (86.40%-105.60%) | Beta (11.04, 0.46) | Xie Q et al. (2019)10 |
| Pan-genotypic DAA in patients with DC | 92.30% (83.07%-101.53%) | Beta (22.18, 1.85) | Tada T et al. (2021)11 |
| Screening coverage | 90.00% (81.00%-99.00%) | Beta (29.10, 3.23) | Li Jian et al. (2022)12 |
| Transition rate by pregnant | 5.00% (4.50%-5.50%) | Beta (284.95, 5414.05) | Conte D et al. (2000)13 |
| Sensitivity of screening | 98.10% (88.29%-100.00%) | Beta (12.91, 0.25) | Kim et al. (2022)14 |
| Specificity of screening | 99.80% (89.82%-100.00%) | Beta (0.77, 0.00) |

**REFERENCES**

1 Husereau D, Drummond M, Augustovski F, *et al*. Consolidated health economic evaluation reporting standards 2022 (CHEERS 2022) statement: updated reporting guidance for health economic evaluations. *Value Health* 2022;25:3-9.

2 Global Burden Of Disease. GBD results. 2021. Available: https://vizhub.healthdata.org/gbd-results/ [Accessed 3-16].

3 Zhou H, Yan M, Che D, *et al*. Universal screening for HCV infection in china: an effectiveness and cost-effectiveness analysis. *JHEP Rep.* 2024;6:101000.

4 Liu Q, Liu X, Jiang B, *et al*. Forecasting incidence of hemorrhagic fever with renal syndrome in china using ARIMA model. *BMC Infect. Dis.* 2011;11:1-7.

5 Thein H, Yi Q, Dore GJ, *et al*. Estimation of stage-specific fibrosis progression rates in chronic hepatitis c virus infection: a meta-analysis and meta-regression. *Hepatology.* 2008;48:418-31.

6 Chahal HS, Marseille EA, Tice JA, *et al*. Cost-effectiveness of early treatment of hepatitis c virus genotype 1 by stage of liver fibrosis in a US treatment-naive population. *JAMA Intern. Med.* 2016;176:65-73.

7 Maylin S, Martinot-Peignoux M, Moucari R, *et al*. Eradication of hepatitis c virus in patients successfully treated for chronic hepatitis c. *Gastroenterology* 2008;135:821-9.

8 Zhou H, Yan M, Che D, *et al*. Universal screening for HCV infection in china: an effectiveness and cost-effectiveness analysis. *JHEP Rep.* 2024;6:101000.

9 Liu Y, Zou X, Chen W, *et al*. Hepatitis c virus treatment status and barriers among patients in methadone maintenance treatment clinics in guangdong province, china: a cross-sectional, observational study. *Int. J. Environ. Res. Public Health* 2019;16.

10 Xie Q, Xuan J, Tang H, *et al*. Hepatitis c virus cure with direct acting antivirals: clinical, economic, societal and patient value for china. *World J. Hepatol.* 2019;11:421.

11 Tada T, Kurosaki M, Nakamura S, *et al*. Real‐world clinical outcomes of sofosbuvir and velpatasvir treatment in HCV genotype 1‐and 2‐infected patients with decompensated cirrhosis: a nationwide multicenter study by the japanese red cross liver study group. *J. Med. Virol.* 2021;93:6247-56.

12 Li J, Pang L, Liu Z. Interpretation of the national action plan for eliminating hepatitis c as a public health threat (2021–2030). *China CDC Weekly* 2022;4:627.

13 Conte D, Fraquelli M, Prati D, *et al*. Prevalence and clinical course of chronic hepatitis c virus (HCV) infection and rate of HCV vertical transmission in a cohort of 15,250 pregnant women. *Hepatology.* 2000;31:751-5.

14 Kim H, Kim K, Choi GH, *et al*. A cost-effectiveness study of universal screening for hepatitis c virus infection in south korea: a societal perspective. *Clin. Mol. Hepatol.* 2022;28:91-104.
